# Supplementary material
Source: PubMed Central journal article supplement (PMC3654760)
Supplement: DS_10.1177_0022034513487559.pdf [file DS_10.1177_0022034513487559.pdf]

Y.W. Han<sup>1,2,3\*</sup> and X. Wang<sup>1</sup>

<sup>1</sup>Department of Periodontics; <sup>2</sup>Department of Pathology; and <sup>3</sup>Department of Reproductive Biology, Case Western Reserve University, Cleveland, OH, USA 44106; \*corresponding author, yiping.han@case.edu

# Mobile Microbiome: Oral Bacteria in Extra-oral Infections and Inflammation

*J Dent Res* DOI: 10.1177/0022034513487559

## APPENDIX

**Appendix Table.** Summary of Oral Species Implicated in Extra-oral Infections and Inflammation, with References

| Extra-oral Infections Complicated by Oral Bacteria           | Oral Species Detected                                                                                                                                                                                                                                                                                                                                                                                                                      | References                                                                                                                                                                                                                                                                                               |
|--------------------------------------------------------------|--------------------------------------------------------------------------------------------------------------------------------------------------------------------------------------------------------------------------------------------------------------------------------------------------------------------------------------------------------------------------------------------------------------------------------------------|----------------------------------------------------------------------------------------------------------------------------------------------------------------------------------------------------------------------------------------------------------------------------------------------------------|
| Cardiovascular diseases (CVD)                                | <i>Aggregatibacter actinomycetemcomitans</i><br><i>Campylobacter rectus</i><br><i>Chlamydia pneumoniae</i><br><i>Eikenella corrodens</i><br><i>Fusobacterium necrophorum</i><br><i>Fusobacterium nucleatum</i><br><i>Porphyromonas gingivalis</i><br><i>Prevotella intermedia</i><br><i>Streptococcus mitis</i><br><i>Streptococcus mutans</i><br><i>Streptococcus oralis</i><br><i>Tannerella forsythia</i><br><i>Treponema denticola</i> | de Toledo <i>et al.</i> , 2012; Figuero <i>et al.</i> , 2011; Ford <i>et al.</i> , 2005, 2006; Huang <i>et al.</i> , 2002; Nakano <i>et al.</i> , 2009; Ohki <i>et al.</i> , 2012; Okuda <i>et al.</i> , 2001; Pucar <i>et al.</i> , 2007; Westling and Vondracek, 2008                                  |
| Adverse pregnancy outcomes (APO)                             | <i>Begeyella</i> spp.<br><i>Campylobacter rectus</i><br><i>Capnocytophaga</i> spp.<br><i>Eikenella corrodens</i><br><i>Fusobacterium nucleatum</i><br><i>Peptostreptococcus micros</i><br><i>Porphyromonas gingivalis</i><br><i>Prevotella intermedia</i><br><i>Prevotella nigrescens</i><br><i>Rothia dentocariosa</i><br><i>Streptococcus mutans</i><br><i>Tannerella forsythia</i><br><i>Treponema denticola</i>                        | Bohrer <i>et al.</i> , 2012; DiGiulio <i>et al.</i> , 2010; Dixon <i>et al.</i> , 1994; Garnier <i>et al.</i> , 2009; Han <i>et al.</i> , 2006, 2009, 2010; Katz <i>et al.</i> , 2009; Leon <i>et al.</i> , 2007; Madianos <i>et al.</i> , 2001; Morency <i>et al.</i> , 2006; Wang <i>et al.</i> , 2013 |
| Rheumatoid arthritis (RA)                                    | <i>Fusobacterium nucleatum</i><br><i>Porphyromonas gingivalis</i><br><i>Prevotella intermedia</i><br><i>Prevotella melaninogenica</i><br><i>Serratia proteamaculans</i><br><i>Tannerella forsythia</i>                                                                                                                                                                                                                                     | Martinez-Martinez <i>et al.</i> , 2009; Ogrendik <i>et al.</i> , 2005; Ogrendik, 2012; Temoin <i>et al.</i> , 2012                                                                                                                                                                                       |
| Inflammatory bowel disease (IBD) and colorectal cancer (CRC) | <i>Campylobacter concisus</i><br><i>Fusobacterium nucleatum</i><br><i>Streptococcus mutans</i>                                                                                                                                                                                                                                                                                                                                             | Castellarin <i>et al.</i> , 2012; Ismail <i>et al.</i> , 2012; Kojima <i>et al.</i> , 2012; Kostic <i>et al.</i> , 2012; Strauss <i>et al.</i> , 2011                                                                                                                                                    |
| Respiratory tract infections (RTI)                           | <i>Staphylococcus aureus</i><br><i>Pseudomonas aeruginosa</i><br><i>Acinetobacter</i> species<br><i>Candida albicans</i><br>Enteric species                                                                                                                                                                                                                                                                                                | Heo <i>et al.</i> , 2008, 2011                                                                                                                                                                                                                                                                           |
| Meningitis or brain abscesses                                | <i>Campylobacter rectus</i><br><i>Fusobacterium necrophorum</i><br><i>Fusobacterium nucleatum</i><br><i>Porphyromonas gingivalis</i><br><i>Streptococcus intermedius</i>                                                                                                                                                                                                                                                                   | Al Masalma <i>et al.</i> , 2012; Heckmann <i>et al.</i> , 2003; Kai <i>et al.</i> , 2008; Keller <i>et al.</i> , 2010; Saito <i>et al.</i> , 2012; Shimohata <i>et al.</i> , 2012                                                                                                                        |
| Lung, liver, or splenic abscesses                            | <i>Fusobacterium necrophorum</i><br><i>Fusobacterium nucleatum</i><br><i>Porphyromonas gingivalis</i><br><i>Prevotella</i> sp.<br><i>Treponema denticola</i>                                                                                                                                                                                                                                                                               | Handler <i>et al.</i> , 2011; Kuppalli <i>et al.</i> , 2012; Lei <i>et al.</i> , 2009; Ohyama <i>et al.</i> , 2009; Price <i>et al.</i> , 2012; Yoneda <i>et al.</i> , 2011                                                                                                                              |
| Appendicitis                                                 | <i>Fusobacterium necrophorum</i><br><i>Fusobacterium nucleatum</i>                                                                                                                                                                                                                                                                                                                                                                         | Roblin <i>et al.</i> , 2012; Swidsinski <i>et al.</i> , 2011                                                                                                                                                                                                                                             |

## REFERENCES, APPENDIX TABLE

- Al Masalma M, Lonjon M, Richet H, Dufour H, Roche PH, Drancourt M, et al. (2012). Metagenomic analysis of brain abscesses identifies specific bacterial associations. *Clin Infect Dis* 54:202-210.
- Bohrer JC, Kamemoto LE, Almeida PG, Ogasawara KK (2012). Acute chorioamnionitis at term caused by the oral pathogen *Fusobacterium nucleatum*. *Hawaii J Med Public Health* 71:280-281.
- Castellarin M, Warren RL, Freeman JD, Dreolini L, Krzywinski M, Strauss J, et al. (2012). *Fusobacterium nucleatum* infection is prevalent in human colorectal carcinoma. *Genome Res* 22:299-306.
- de Toledo A, Nagata E, Yoshida Y, Oho T (2012). *Streptococcus oralis* coaggregation receptor polysaccharides induce inflammatory responses in human aortic endothelial cells. *Mol Oral Microbiol* 27:295-307.
- DiGiulio DB, Romero R, Kusanovic JP, Gomez R, Kim CJ, Seok KS, et al. (2010). Prevalence and diversity of microbes in the amniotic fluid, the fetal inflammatory response, and pregnancy outcome in women with preterm pre-labor rupture of membranes. *Am J Reprod Immunol* 64:38-57.
- Dixon NG, Ebright D, DeFrancesco MA, Hawkins RE (1994). Oro-genital contact: a cause of chorioamnionitis? *Obstet Gynecol* 84(4 Pt 2):654-655.
- Figuro E, Sanchez-Beltran M, Cuesta-Frechoso S, Tejerina JM, del Castro JA, Gutierrez JM, et al. (2011). Detection of periodontal bacteria in atheromatous plaque by nested polymerase chain reaction. *J Periodontol* 82:1469-1477.
- Ford PJ, Gemmell E, Hamlet SM, Hasan A, Walker PJ, West MJ, et al. (2005). Cross-reactivity of GroEL antibodies with human heat shock protein 60 and quantification of pathogens in atherosclerosis. *Oral Microbiol Immunol* 20:296-302.
- Ford PJ, Gemmell E, Chan A, Carter CL, Walker PJ, Bird PS, et al. (2006). Inflammation, heat shock proteins and periodontal pathogens in atherosclerosis: an immunohistologic study. *Oral Microbiol Immunol* 21:206-211.
- Garnier F, Masson G, Bedu A, Masson P, Decroissette E, Guignon V, et al. (2009). Maternofetal infections due to *Eikenella corrodens*. *J Med Microbiol* 58(Pt 2):273-275.
- Han YW, Ikegami A, Bissada NF, Herbst M, Redline RW, Ashmead GG (2006). Transmission of an uncultivated *Bergeyella* strain from the oral cavity to amniotic fluid in a case of preterm birth. *J Clin Microbiol* 44:1475-1483.
- Han YW, Shen T, Chung P, Buhimschi IA, Buhimschi CS (2009). Uncultivated bacteria as etiologic agents of intra-amniotic inflammation leading to preterm birth. *J Clin Microbiol* 47:38-47.
- Han YW, Fardini Y, Chen C, Iacampo KG, Peraino VA, Shamonki JM, et al. (2010). Term stillbirth caused by oral *Fusobacterium nucleatum*. *Obstet Gynecol* 115(2 Pt 2):442-445.
- Handler MZ, Miriovsky B, Gendelman HE, Sandkovsky U (2011). *Fusobacterium necrophorum* causing infective endocarditis and liver and splenic abscesses. *Rev Inst Med Trop São Paulo* 53:169-172.
- Heckmann JG, Lang CJ, Hartl H, Tomandl B (2003). Multiple brain abscesses caused by *Fusobacterium nucleatum* treated conservatively. *Can J Neurol Sci* 30:266-268.
- Heo SM, Haase EM, Lesse AJ, Gill SR, Scannapieco FA (2008). Genetic relationships between respiratory pathogens isolated from dental plaque and bronchoalveolar lavage fluid from patients in the intensive care unit undergoing mechanical ventilation. *Clin Infect Dis* 47:1562-1570.
- Heo SM, Sung RS, Scannapieco FA, Haase EM (2011). Genetic relationships between *Candida albicans* strains isolated from dental plaque, trachea, and bronchoalveolar lavage fluid from mechanically ventilated intensive care unit patients. *J Oral Microbiol* 3:6362.
- Huang IF, Chiou CC, Liu YC, Hsieh KS (2002). Endocarditis caused by penicillin-resistant *Streptococcus mitis* in a 12-year-old boy. *J Microbiol Immunol Infect* 35:129-132.
- Ismail Y, Mahendran V, Octavia S, Day AS, Riordan SM, Grimm MC, et al. (2012). Investigation of the enteric pathogenic potential of oral *Campylobacter concisus* strains isolated from patients with inflammatory bowel disease. *PLoS One* 7:e38217.
- Kai A, Cooke F, Antoun N, Siddharthan C, Sule O (2008). A rare presentation of ventriculitis and brain abscess caused by *Fusobacterium nucleatum*. *J Med Microbiol* 57:668-671.
- Katz J, Chegini N, Shiverick KT, Lamont RJ (2009). Localization of *P. gingivalis* in preterm delivery placenta. *J Dent Res* 88:575-578.
- Keller PM, Rampini SK, Bloemberg GV (2010). Detection of a mixed infection in a culture-negative brain abscess by broad-spectrum bacterial 16S rRNA gene PCR. *J Clin Microbiol* 48:2250-2252.
- Kojima A, Nakano K, Wada K, Takahashi H, Katayama K, Yoneda M, et al. (2012). Infection of specific strains of *Streptococcus mutans*, oral bacteria, confers a risk of ulcerative colitis. *Sci Rep* 2:332.
- Kostic AD, Gevers D, Pedamallu CS, Michaud M, Duke F, Earl AM, et al. (2012). Genomic analysis identifies association of *Fusobacterium* with colorectal carcinoma. *Genome Res* 22:292-298.
- Kuppalli K, Livorsi D, Talati NJ, Osborn M (2012). Lemierre's syndrome due to *Fusobacterium necrophorum*. *Lancet Infect Dis* 12:808-815.
- Lei WY, Chang WH, Shih SC, Liu CJ, Shih CH (2009). Pyogenic liver abscess with *Prevotella* species and *Fusobacterium necrophorum* as causative pathogens in an immunocompetent patient. *J Formos Med Assoc* 108:253-257.
- Leon R, Silva N, Ovalle A, Chaparro A, Ahumada A, Gajardo M, et al. (2007). Detection of *Porphyromonas gingivalis* in the amniotic fluid in pregnant women with a diagnosis of threatened premature labor. *J Periodontol* 78:1249-1255.
- Madianos PN, Lief S, Murtha AP, Boggess KA, Auten RL Jr, Beck JD, et al. (2001). Maternal periodontitis and prematurity. Part II: Maternal infection and fetal exposure. *Ann Periodontol* 6:175-182.
- Martinez-Martinez RE, Abud-Mendoza C, Patino-Marin N, Rizo-Rodriguez JC, Little JW, Loyola-Rodriguez JP (2009). Detection of periodontal bacterial DNA in serum and synovial fluid in refractory rheumatoid arthritis patients. *J Clin Periodontol* 36:1004-1010.
- Morency AM, Rallu F, Laferriere C, Bujold E (2006). Eradication of intra-amniotic *Streptococcus mutans* in a woman with a short cervix. *J Obstet Gynaecol Can* 28:898-902.
- Nakano K, Nemoto H, Nomura R, Inaba H, Yoshioka H, Taniguchi K, et al. (2009). Detection of oral bacteria in cardiovascular specimens. *Oral Microbiol Immunol* 24:64-68.
- Ogrendik M (2012). Does periodontopathic bacterial infection contribute to the etiopathogenesis of the autoimmune disease rheumatoid arthritis? *Discov Med* 13:349-355.
- Ogrendik M, Kokino S, Ozdemir F, Bird PS, Hamlet S (2005). Serum antibodies to oral anaerobic bacteria in patients with rheumatoid arthritis. *MedGenMed* 7:2.
- Ohki T, Itabashi Y, Kohno T, Yoshizawa A, Nishikubo S, Watanabe S, et al. (2012). Detection of periodontal bacteria in thrombi of patients with acute myocardial infarction by polymerase chain reaction. *Am Heart J* 163:164-167.
- Ohyama H, Nakasho K, Yamanegi K, Noiri Y, Kuhara A, Kato-Kogoe N, et al. (2009). An unusual autopsy case of pyogenic liver abscess caused by periodontal bacteria. *Jpn J Infect Dis* 62:381-383.
- Okuda K, Ishihara K, Nakagawa T, Hirayama A, Inayama Y, Okuda K (2001). Detection of *Treponema denticola* in atherosclerotic lesions. *J Clin Microbiol* 39:1114-1117.
- Price K, Wilson L, Tsegaye M (2012). A case of craniocervical abscess with sinus thrombosis in Lemierre's syndrome. *Br J Neurosurg* 26:426-428.
- Pucar A, Milasin J, Lekovic V, Vukadinovic M, Ristic M, Putnik S, et al. (2007). Correlation between atherosclerosis and periodontal putative pathogenic bacterial infections in coronary and internal mammary arteries. *J Periodontol* 78:677-682.
- Roblin X, Neut C, Darfeuille-Michaud A, Colombel JF (2012). Local appendiceal dysbiosis: the missing link between the appendix and ulcerative colitis? *Gut* 61:635-636.
- Saito N, Hida A, Koide Y, Ooka T, Ichikawa Y, Shimizu J, et al. (2012). Culture-negative brain abscess with *Streptococcus intermedius* infection with diagnosis established by direct nucleotide sequence analysis of the 16S ribosomal RNA gene. *Intern Med (Tokyo, Japan)* 51:211-216.
- Shimohata M, Naruse S, Kawasaki S, Watanabe Y, Koyama M, Ito Y, et al. (2012). Brain abscess due to *Fusobacterium necrophorum* in a patient

- with convulsion and no signs of meningitis. *Rinsho Shinkeigaku (Clin Neurol)* 52:429-432.
- Strauss J, Kaplan GG, Beck PL, Rioux K, Panaccione R, Devinney R, et al. (2011). Invasive potential of gut mucosa-derived *Fusobacterium nucleatum* positively correlates with IBD status of the host. *Inflamm Bowel Dis* 17:1971-1978.
- Swidsinski A, Dorffel Y, Loening-Baucke V, Theissig F, Ruckert JC, Ismail M, et al. (2011). Acute appendicitis is characterised by local invasion with *Fusobacterium nucleatum/necrophorum*. *Gut* 60:34-40.
- Temoin S, Chakaki A, Askari A, El-Halaby A, Fitzgerald S, Marcus RE, et al. (2012). Identification of oral bacterial DNA in synovial fluid of patients with arthritis with native and failed prosthetic joints. *J Clin Rheumatol* 18:117-121.
- Wang XW, Buhimschi CS, Temoin S, Bhandar V, Han YW, Buhimschi IA (2013). Comparative microbial analysis of paired amniotic fluid and cord blood from pregnancies complicated by preterm and early-onset neonatal sepsis. *PLoS One* 8:e56131.
- Westling K, Vondracek M (2008). *Actinobacillus (Aggregatibacter) actinomycetemcomitans* (HACEK) identified by PCR/16S rRNA sequence analysis from the heart valve in a patient with blood culture negative endocarditis. *Scand J Infect Dis* 40:981-983.
- Yoneda M, Kato S, Mawatari H, Kirikoshi H, Imajo K, Fujita K, et al. (2011). Liver abscess caused by periodontal bacterial infection with *Fusobacterium necrophorum*. *Hepatol Res* 41:194-196.

## ADDITIONAL REFERENCES FOR MAIN TEXT

### Introduction:

- Hunter W (1900). Oral sepsis as a cause of disease. *Br Med J* 2:215-216.
- Miller WD (1891). The human mouth as a focus of infection. *Dental Cosmos* 33:689-706.
- Newman HN (1996). Focal infection. *J Dent Res* 75:1912-1919.
- Scannapieco FA (1998). Position paper of The American Academy of Periodontology: periodontal disease as a potential risk factor for systemic diseases. *J Periodontol* 69:841-850.

### (III) Systemic Diseases Implicated by Oral Bacteria

#### Atherosclerotic Disease (AD)

- Ford PJ, Gemmel E, Hamlet SM, Hasan A, Walker PJ, West MJ, et al. (2005). Cross-reactivity of GroEL antibodies with human heat shock protein 60 and quantification of pathogens in atherosclerosis. *Oral Microbiol Immunol* 20:296-302.

#### Adverse Pregnancy Outcomes (APO)

- Bohrer JC, Kamemoto LE, Almeida PG, Ogasawara KK (2012). Acute chorioamnionitis at term caused by the oral pathogen *Fusobacterium nucleatum*. *Hawaii J Med Public Health* 71:280-281.
- Dixon NG, Ebright D, DeFrancesco MA, Hawkins RE (1994). Oro-genital contact: a cause of chorioamnionitis? *Obstet Gynecol* 84(4 Pt 2):654-655.
- Dzink JL, Sheenan MT, Socransky SS (1990). Proposal of three subspecies of *Fusobacterium nucleatum* Knorr 1922: *Fusobacterium nucleatum* subsp. *nucleatum* subsp. nov., comb. nov.; *Fusobacterium nucleatum* subsp. *polymorphum* subsp. nov., nom. rev., comb. nov.; and *Fusobacterium nucleatum* subsp. *vincentii* subsp. nov., nom. rev., comb. nov. *Int J Syst Bacteriol* 40:74-78.
- Gharbia SE, Shah HN (1992). *Fusobacterium nucleatum* subsp. *fusiforme* subsp. nov. and *Fusobacterium nucleatum* subsp. *animalis* subsp. nov. as additional subspecies within *Fusobacterium nucleatum*. *Int J Syst Bacteriol* 42:296-298.
- Madianos PN, Lieff S, Murtha AP, Boggess KA, Auten RL Jr, Beck JD, et al. (2001). Maternal periodontitis and prematurity. Part II: Maternal infection and fetal exposure. *Ann Periodontol* 6:175-182.
- Mitchell-Lewis D, Engebretson SP, Chen J, Lamster IB, Papapanou PN (2001). Periodontal infections and pre-term birth: early findings from a cohort of young minority women in New York. *Eur J Oral Sci* 109:34-39.

- Nagashima T, Kobayashi M, Teramoto S, Okano E, Yokoi T, Eto Y (2009). Extremely low-birthweight neonate with prenatal *Campylobacter* infection. *Pediatr Int* 51:746-748.
- Tateishi F, Hasegawa-Nakamura K, Nakamura T, Oogai Y, Komatsuzawa H, Kawamata K, et al. (2012). Detection of *Fusobacterium nucleatum* in chorionic tissues of high-risk pregnant women. *J Clin Periodontol* 39:417-424.

### Rheumatoid Arthritis (RA)

- Abou-Raya A, Abou-Raya S, Abu-Elkheir H (2005). Periodontal disease and rheumatoid arthritis: is there a link? *Scand J Rheumatol* 34:408-410.
- de Pablo P, Chapple IL, Buckley CD, Dietrich T (2009). Periodontitis in systemic rheumatic diseases. *Nat Rev Rheumatol* 5:218-224.

### Inflammatory Bowel Disease (IBD) and Colorectal Cancer (CRC)

- Kojima A, Nakano K, Wada K, Takahashi H, Katayama K, Yoneda M, et al. (2012). Infection of specific strains of *Streptococcus mutans*, oral bacteria, confers a risk of ulcerative colitis. *Sci Rep* 2:332.
- Segata N, Haake SK, Mannon P, Lemon KP, Waldron L, Gevers D, et al. (2012). Composition of the adult digestive tract bacterial microbiome based on seven mouth surfaces, tonsils, throat and stool samples. *Genome Biol* 13:R42.
- Stepankova R, Powrie F, Kofronova O, Kozakova H, Hudcovic T, Hrnecir T, et al. (2007). Segmented filamentous bacteria in a defined bacterial cocktail induce intestinal inflammation in SCID mice reconstituted with CD45RBhigh CD4+ T cells. *Inflamm Bowel Dis* 13:1202-1211.

### Other Organ Inflammation and Abscesses

- Al Masalma M, Lonjon M, Richet H, Dufour H, Roche PH, Drancourt M, et al. (2012). Metagenomic analysis of brain abscesses identifies specific bacterial associations. *Clin Infect Dis* 54:202-210.
- Handler MZ, Miriovsky B, Gendelman HE, Sandkovsky U (2011). *Fusobacterium necrophorum* causing infective endocarditis and liver and splenic abscesses. *Rev Inst Med Trop São Paulo* 53:169-172.
- Heckmann JG, Lang CJ, Hartl H, Tomandl B (2003). Multiple brain abscesses caused by *Fusobacterium nucleatum* treated conservatively. *Can J Neurol Sci* 30:266-268.
- Kai A, Cooke F, Antoun N, Siddharthan C, Sule O (2008). A rare presentation of ventriculitis and brain abscess caused by *Fusobacterium nucleatum*. *J Med Microbiol* 57(Pt 5):668-671.
- Keller PM, Rampini SK, Bloemberg GV (2010). Detection of a mixed infection in a culture-negative brain abscess by broad-spectrum bacterial 16S rRNA gene PCR. *J Clin Microbiol* 48:2250-2252.
- Kuppalli K, Livorsi D, Talati NJ, Osborn M (2012). Lemierre's syndrome due to *Fusobacterium necrophorum*. *Lancet Infect Dis* 12:808-815.
- Price K, Wilson L, Tsegaye M (2012). A case of craniocervical abscess with sinus thrombosis in Lemierre's syndrome. *Br J Neurosurg* 26:426-428.
- Shimohata M, Naruse S, Kawasaki S, Watanabe Y, Koyama M, Ito Y, et al. (2012). Brain abscess due to *Fusobacterium necrophorum* in a patient with convulsion and no signs of meningitis. *Rinsho Shinkeigaku* 52:429-432.
- Yoneda M, Kato S, Mawatari H, Kirikoshi H, Imajo K, Fujita K, et al. (2011). Liver abscess caused by periodontal bacterial infection with *Fusobacterium necrophorum*. *Hepatol Res* 41:194-196.

### (IV) Potential Virulence Mechanisms of Oral Bacteria in Extra-oral Infections

#### *Fusobacterium nucleatum* (Fn)

- Han YW, Shi W, Huang GT, Kinder Haake S, Park NH, Kuramitsu H, et al. (2000). Interactions between periodontal bacteria and human oral epithelial cells: *Fusobacterium nucleatum* adheres to and invades epithelial cells. *Infect Immun* 68:3140-3146.
- Han YW, Redline RW, Li M, Yin L, Hill GB, McCormick TS (2004). *Fusobacterium nucleatum* induces premature and term stillbirths in

- pregnant mice: implication of oral bacteria in preterm birth. *Infect Immun* 72:2272-2279.
- Han YW, Ikegami A, Rajanna C, Kawsar HI, Zhou Y, Li M, *et al.* (2005). Identification and characterization of a novel adhesin unique to oral fusobacteria. *J Bacteriol* 187:5330-5340.
- Kaplan CW, Lux R, Huynh T, Jewett A, Shi W, Haake SK (2005). *Fusobacterium nucleatum* apoptosis-inducing outer membrane protein. *J Dent Res* 84:700-704.
- Moore WE, Moore LV (1994). The bacteria of periodontal diseases. *Periodontol* 2000 5:66-77.
- Shenker BJ, Datar S (1995). *Fusobacterium nucleatum* inhibits human T-cell activation by arresting cells in the mid-G1 phase of the cell cycle. *Infect Immun* 63:4830-4836.
- Skar CK, Kruger PG, Bakken V (2003). Characterisation and subcellular localisation of the GroEL-like and DnaK-like proteins isolated from *Fusobacterium nucleatum* ATCC 10953. *Anaerobe* 9:305-312.
- Wick G, Perschinka H, Xu Q (1999). Autoimmunity and atherosclerosis. *Am Heart J* 138(5 Pt 2):444S-449S.
- Porphyromonas gingivalis* (Pg)**
- Belibasakis GN, Bostanci N, Reddi D (2010). Regulation of protease-activated receptor-2 expression in gingival fibroblasts and Jurkat T cells by *Porphyromonas gingivalis*. *Cell Biol Int* 34:287-292.
- Bostanci N, Belibasakis GN (2012). *Porphyromonas gingivalis*: an invasive and evasive opportunistic oral pathogen. *FEMS Microbiol Lett* 333:1-9.
- Fagundes JA, Monoo LD, Euzebio Alves VT, Pannuti CM, Cortelli SC, Cortelli JR, *et al.* (2011). *Porphyromonas gingivalis* is associated with protease-activated receptor-2 upregulation in chronic periodontitis. *J Periodontol* 82:1596-1601.
- Gibson FC 3rd, Hong C, Chou HH, Yumoto H, Chen J, Lien E, *et al.* (2004). Innate immune recognition of invasive bacteria accelerates atherosclerosis in apolipoprotein E-deficient mice. *Circulation* 109:2801-2806.
- Hajishengallis G, Darveau RP, Curtis MA (2012). The keystone-pathogen hypothesis. *Nat Rev Microbiol* 10:717-725.
- Inomata M, Ishihara Y, Matsuyama T, Imamura T, Maruyama I, Noguchi T, *et al.* (2009). Degradation of vascular endothelial thrombomodulin by arginine- and lysine-specific cysteine proteases from *Porphyromonas gingivalis*. *J Periodontol* 80:1511-1517.
- Kitamura Y, Matono S, Aida Y, Hirofujii T, Maeda K (2002). Gingipains in the culture supernatant of *Porphyromonas gingivalis* cleave CD4 and CD8 on human T cells. *J Periodontol Res* 37:464-468.
- Laine ML, van Winkelhoff AJ (1998). Virulence of six capsular serotypes of *Porphyromonas gingivalis* in a mouse model. *Oral Microbiol Immunol* 13:322-325.
- Miyamoto T, Yumoto H, Takahashi Y, Davey M, Gibson FC 3rd, Genco CA (2006). Pathogen-accelerated atherosclerosis occurs early after exposure and can be prevented via immunization. *Infect Immun* 74:1376-1380.
- Nakagawa I, Inaba H, Yamamura T, Kato T, Kawai S, Ooshima T, *et al.* (2006). Invasion of epithelial cells and proteolysis of cellular focal adhesion components by distinct types of *Porphyromonas gingivalis* fimbriae. *Infect Immun* 74:3773-3782.
- Sohn M, Marklein B, Burmester GR, Skriner K (2012). Outer membrane vesicles containing autocitrullinated peptidylarginine deiminase from *Porphyromonas gingivalis* part of an infection model in RA? *Ann Rheum Dis* 71:A27-A28.
- Streptococcus mutans* (Sm)**
- Chia JS, Lin YL, Lien HT, Chen JY (2004). Platelet aggregation induced by serotype polysaccharides from *Streptococcus mutans*. *Infect Immun* 72:2605-2617.
- Engels-Deutsch M, Pini A, Yamashita Y, Shibata Y, Haikel Y, Scholler-Guinard M, *et al.* (2003). Insertional inactivation of pac and rmlB genes reduces the release of tumor necrosis factor alpha, interleukin-6, and interleukin-8 induced by *Streptococcus mutans* in monocytic, dental pulp, and periodontal ligament cells. *Infect Immun* 71:5169-5177.
- Herzberg MC, Meyer MW (1996). Effects of oral flora on platelets: possible consequences in cardiovascular disease. *J Periodontol* 67(10 Suppl):1138S-1142S.
- Nagata E, Okayama H, Ito HO, Yamashita Y, Inoue M, Oho T (2006). Serotype-specific polysaccharide of *Streptococcus mutans* contributes to infectivity in endocarditis. *Oral Microbiol Immunol* 21:420-423.
- Nagata E, de Toledo A, Oho T (2011). Invasion of human aortic endothelial cells by oral viridans group streptococci and induction of inflammatory cytokine production. *Mol Oral Microbiol* 26:78-88.
- Nakano K, Nomura R, Taniguchi N, Lapirattanakul J, Kojima A, Naka S, *et al.* (2010). Molecular characterization of *Streptococcus mutans* strains containing the cnm gene encoding a collagen-binding adhesin. *Arch Oral Biol* 55:34-39.
